# Supplementary material
Source: PubMed Central journal article supplement (PMC1948937)

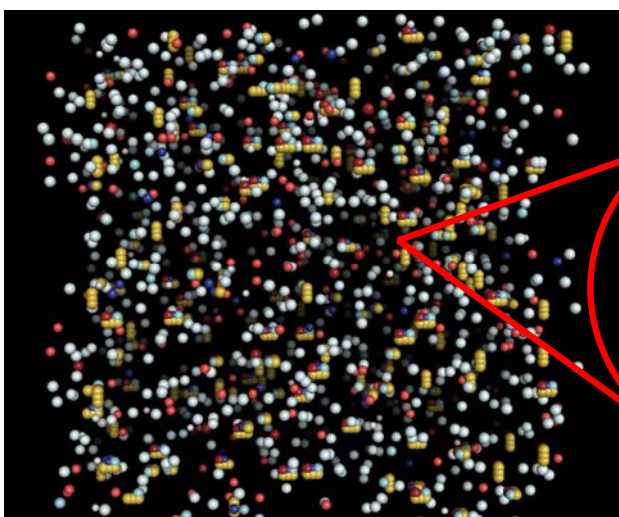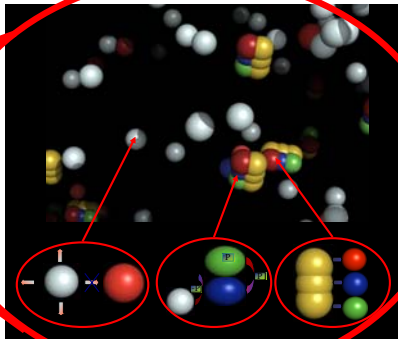

Supplement: pnas_0706311104_2.pdf [file pnas_0706311104_2.pdf]

a.)

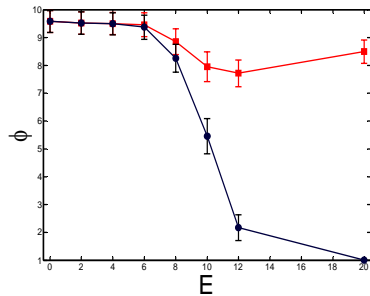

b.)

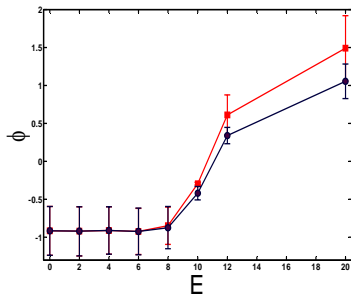

c.)

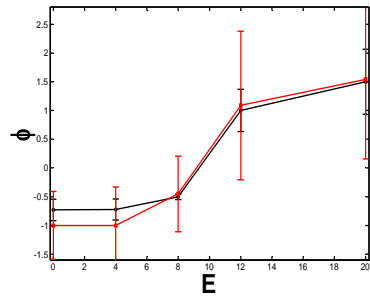

d.)

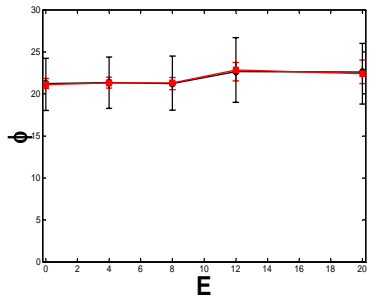

e.)

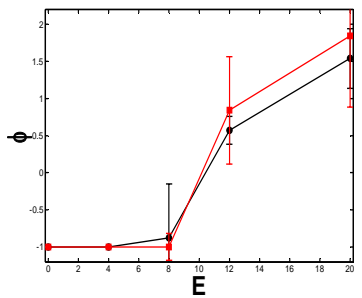

f.)

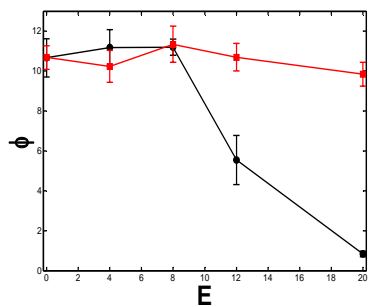

Supplement: pnas_0706311104_3.pdf [file pnas_0706311104_3.pdf]

# MAPK output (Scaffolded/No Scaffold)

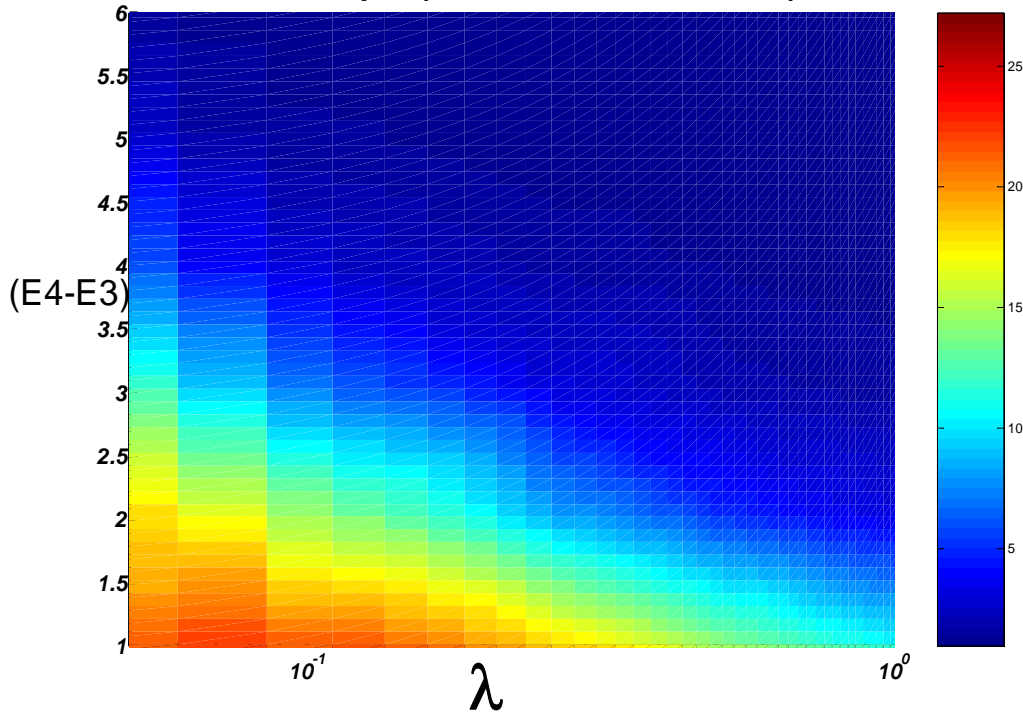

Supplement: pnas_0706311104_4.pdf [file pnas_0706311104_4.pdf]

a.)

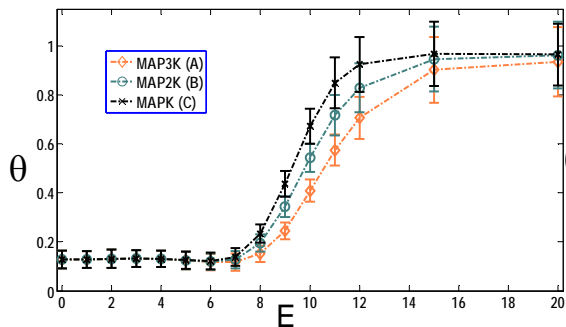

b.)

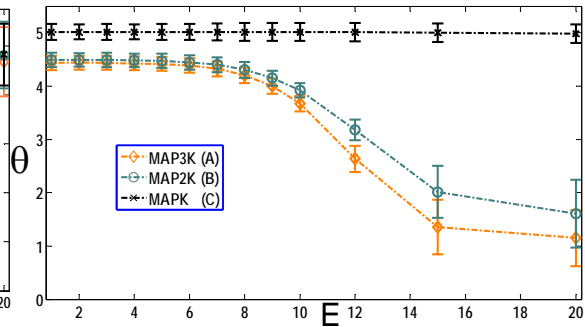

c.)

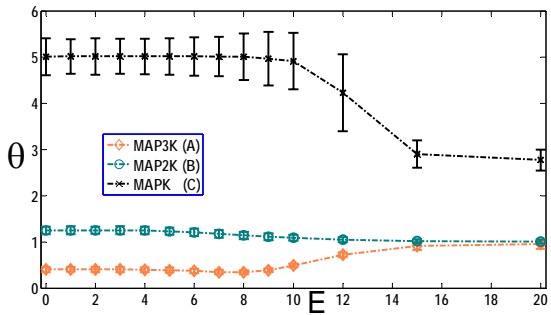

d.)

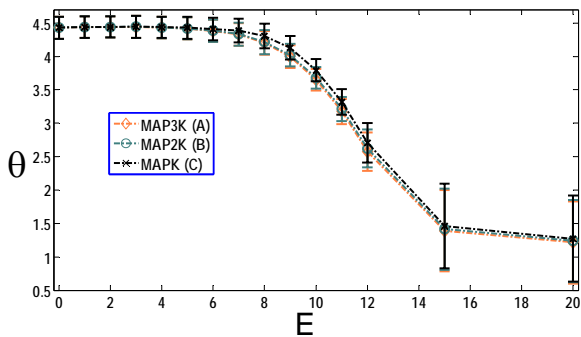

Supplement: pnas_0706311104_5.pdf [file pnas_0706311104_5.pdf]

a.)

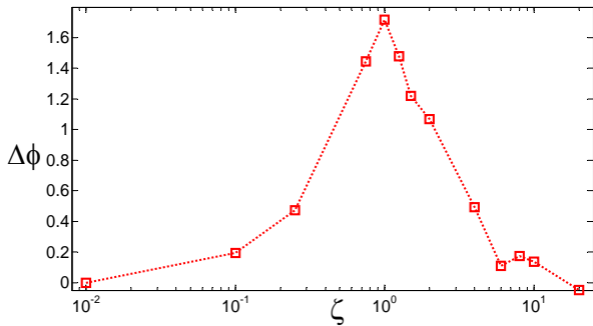

b.)

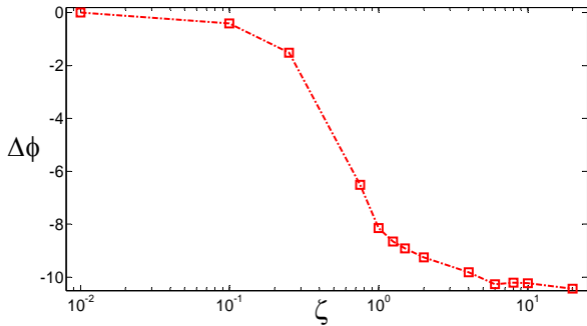

Supplement: pnas_0706311104_6.pdf [file pnas_0706311104_6.pdf]
